# Supplementary material for: Chemically Mediated Microbial “Gardening” Capacity of a Seaweed Holobiont Is Dynamic
Source: MDPI journal article supplement (doi:10.3390/microorganisms8121893), 2020-11-30
Supplement: s1 [file s1]

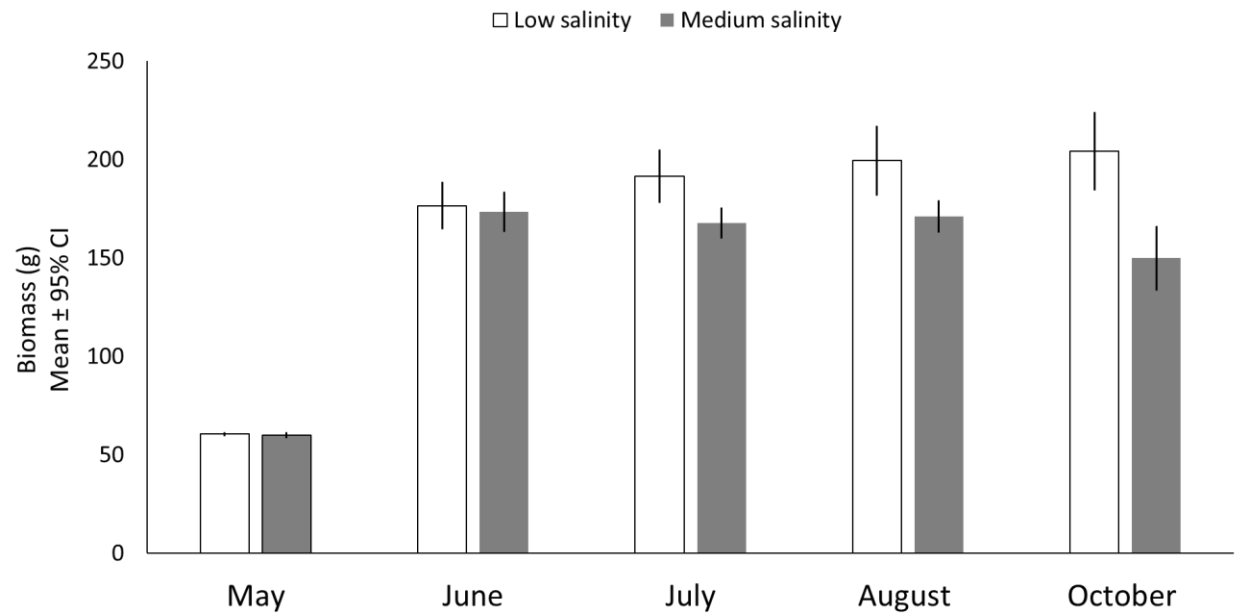

Figure S1: Wet weight of *Agarophyton* between start and end of the experiment at both salinity levels. Error bars  $\pm$  CI (n=5)
